# Supplementary material for: Dedifferentiated fat cells-derived exosomes (DFATs-Exos) loaded in GelMA accelerated diabetic wound healing through Wnt/β-catenin pathway
Source: Springer Nature journal article supplement (doi:10.1186/s13287-025-04205-9), 2025-02-28

**Supplementary Digital Material 1**  
**Uncropped full-length gels and blot of Figure 2F.**

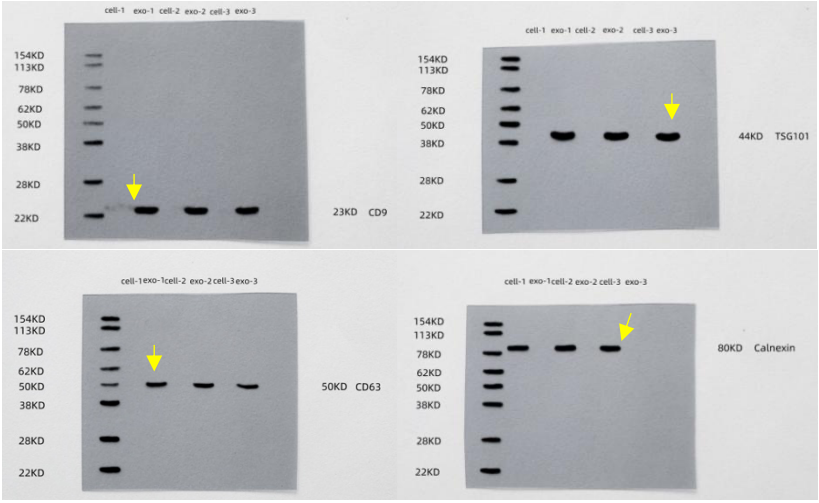

**Uncropped full-length gels and blot of Figure 5D.**

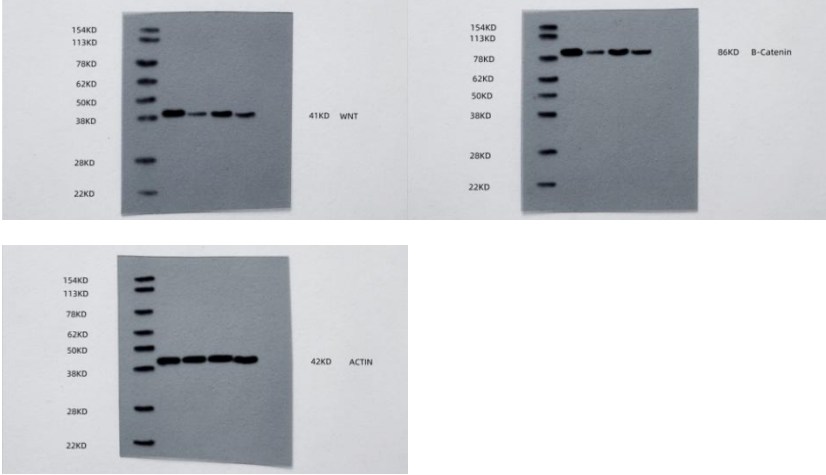

Supplement: MOESM1 [file 13287_2025_4205_MOESM1_ESM.pdf]
